# Supplementary material for: Infection of dogs with SARS-CoV-2
Source: Springer Nature journal article supplement (doi:10.1038/s41586-020-2334-5), 2020-05-14
Supplement: 41586_2020_2334_MOESM1_ESM.pdf [file 41586_2020_2334_MOESM1_ESM.pdf]

**Supplementary information**

---

**Infection of dogs with SARS-CoV-2**

---

In the format provided by the authors and unedited

## Supplementary table: Sequencing primers for full genome sequencing

| Primers        | Sequence 5'-3'              |
|----------------|-----------------------------|
| CoVID19-00001F | ATTAAAGGTTTATACCTTCCCAGG    |
| CoVID19-00025F | CCAACCAACTTTTCGATCTCTTGTA   |
| CoVID19-01895F | TACGATCAATTTTCTCCCGCACTC    |
| CoVID19-01925F | CTGCTCAAATTCTGTGCGTGTTT     |
| CoVID19-03895F | GTTAAGCCATTTATAACTGAAAGT    |
| CoVID19-03925F | TCAGTTGAACAGAGAAAACAAGAT    |
| CoVID19-05895F | AAAACCACTTACTTATAAATTGGA    |
| CoVID19-05925F | TGTTTGTACAGAAATTGACCCTAA    |
| CoVID19-07895F | ATGGTAAATCAAATGTGAAGAAT     |
| CoVID19-07925F | CAAATCAGCGTCTGTTTACTACA     |
| CoVID19-09895F | TATAATAAGTACAAGTATTTTAGT    |
| CoVID19-09925F | ATGGATACAAGTACTAGCTACAGAGAA |
| CoVID19-11895F | ACAACCTCAGAGTAGAATCATCATC   |
| CoVID19-11925F | GTGGGCTCAATGTGTCCAGTTACA    |
| CoVID19-13895F | TGATGATGATTATTTCAATAAAAA    |
| CoVID19-13925F | GTATGATTTTGTAGAAAACCCAGA    |
| CoVID19-15895F | TAGTTAAACAGGGTGATGATTATG    |
| CoVID19-15925F | TTCCTTACCCAGATCCATCAAGAA    |
| CoVID19-17895F | CACTCTTGTAATGTAAACAGATTT    |
| CoVID19-17925F | GCTATTACCAGAGCAAAGTAGGC     |
| CoVID19-19895F | TCCAGCACATATATCTACTATTGG    |
| CoVID19-19925F | TTCTATGACTGACATAGCCAAGAA    |
| CoVID19-21895F | TCGAAGACCCAGTCCCTACTTATT    |
| CoVID19-21925F | AACGCTACTAATGTTGTTATTA      |
| CoVID19-23895F | CCAAGAAGTTTTTGCACAAGTCAA    |
| CoVID19-23925F | TTACAAAACACCACCAATTAAGA     |
| CoVID19-25895F | CATTACTTCAGGTGATGGCACAAC    |
| CoVID19-25925F | TATTTCTGAACATGACTACCAGAT    |
| CoVID19-27895F | GAAATTTCTGTTTTCTTAGGAAT     |
| CoVID19-27925F | AACTGTAGCTGCATTTACCAAGA     |
| CoVID19-02052R | CACCTGTAATGTAGGCCATTACAA    |
| CoVID19-02082R | TTAGCCACTGCGAAGTCAACTGAA    |
| CoVID19-02112R | GTTTTTCATAAACAGTGCCAAA      |
| CoVID19-04052R | AAGAGTGGCAGAATCTGGATGAAG    |
| CoVID19-04082R | CTTTAAGAAAGTGATGTCAATGTC    |
| CoVID19-04112R | AACATCACCCACTATATATGGA      |
| CoVID19-06052R | AATTTGATATTATCACATACAAAC    |
| CoVID19-06082R | TAACCAGTTAACTGGTTTAAATCA    |
| CoVID19-06112R | ACTTTAAGCTCTCTTGAAGCAG      |
| CoVID19-08052R | CGTTAAAAGTTGATGAAAACGTAT    |
| CoVID19-08082R | CAACTAGTGTTTTGAGTTTTTCCA    |

|                |                          |
|----------------|--------------------------|
| CoVID19-08112R | CATTCTTTGCAAGTTCAGCTTC   |
| CoVID19-10052R | TGCCATTTTTCTAAAACCACTCTG |
| CoVID19-10082R | CATACAACCCTCAACTTTACCAGA |
| CoVID19-10112R | AAGTGTAGTTGTACCACAAGTT   |
| CoVID19-12052R | TTGTCCAGCATTTCTTCACAAAGC |
| CoVID19-12082R | TCTGAGGCTATAGCTTGTAAGGTT |
| CoVID19-12112R | AAAGCTGCATATGATGGAAGGG   |
| CoVID19-14052R | AGATCTTGATTATCTAATGTCAGT |
| CoVID19-14082R | AAATCACCGAAATCATACCAGTTA |
| CoVID19-14112R | GGAACTCCACTACCTGGCGTGG   |
| CoVID19-16052R | CAGCATACTCCTGATTAGGATGTT |
| CoVID19-16082R | TTATGTATTGTAAGTACAAATGAA |
| CoVID19-16112R | TGTGTCCTGTAACTCATCATG    |
| CoVID19-18052R | ACTACAATCTTTAAAGAGTCCTGT |
| CoVID19-18082R | CTGTGTAGGATGTAACCCAGTGAT |
| CoVID19-18112R | TTTAGTGTCAACACTGAGGTGT   |
| CoVID19-20052R | TGTAAACCTTTAACTACCTTCT   |
| CoVID19-20082R | AGACTAGCTTGTTTGGGACCTACA |
| CoVID19-20112R | ACGGCTTCTCCAATTAATGTGA   |
| CoVID19-22052R | GACATATTCAAAGTGCAATTATT  |
| CoVID19-22082R | TCCTTCAAGGTCCATAAGAAAAGG |
| CoVID19-22112R | TTCCCTAAGATTTTTGAAATTA   |
| CoVID19-24052R | CCATATTGTTTGATGAAGCCAGCA |
| CoVID19-24082R | TCTCTAGCAGCAATATCACCAAGG |
| CoVID19-24112R | AGGCCGTTAACTTTTGTGCAC    |
| CoVID19-26052R | ACATGTTCAACACCAGTGTCTGTA |
| CoVID19-26082R | TCAACAATTTTATTGTAGATGAAG |
| CoVID19-26112R | GTGTGAATTTGGACATGTTCTT   |
| CoVID19-28052R | CACAATTCAATTAAGGTGCTGAT  |
| CoVID19-28082R | ATGGGTGATTTAGAACCAGCCTCA |
| CoVID19-28112R | ACTGTATAATTACCGATATCGA   |
| CoVID19-29895R | CACATTAGGGCTCTTCATATAGG  |
| CoVID19-29925R | ATGGGGATAGCACTACTAAAATTA |
| CoVID19-29950R | TCTCCTAAGAAGCTATTTAAAAT  |
